# Supplementary material
Source: Springer Nature journal article supplement (https://www.springermedizin.de/resource/supplementary/12943_2007_278_MOESM4_ESM.pdf/9553840)

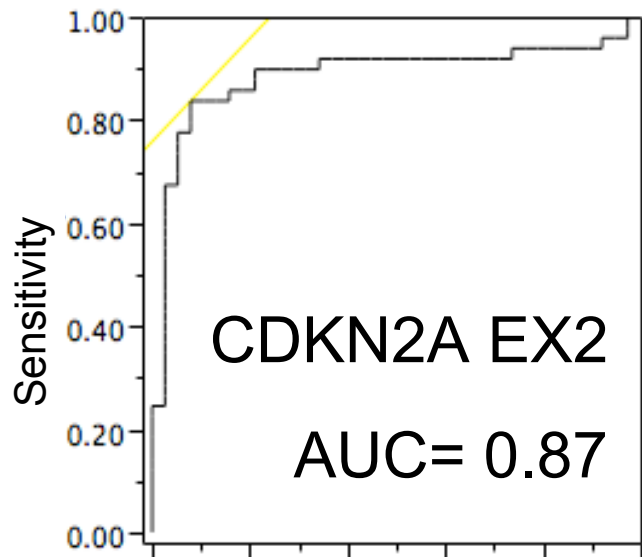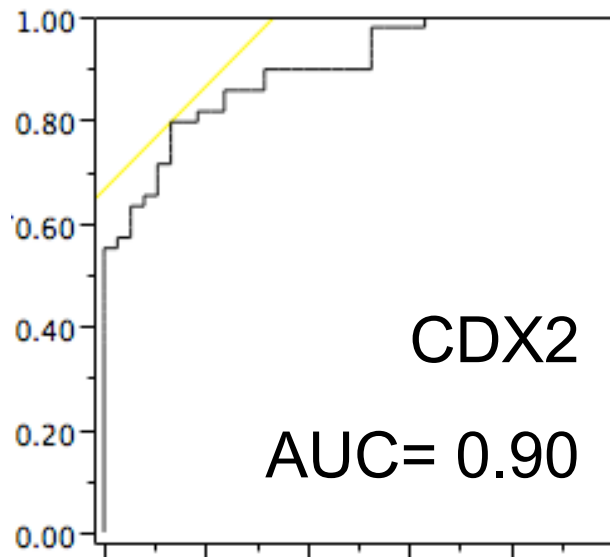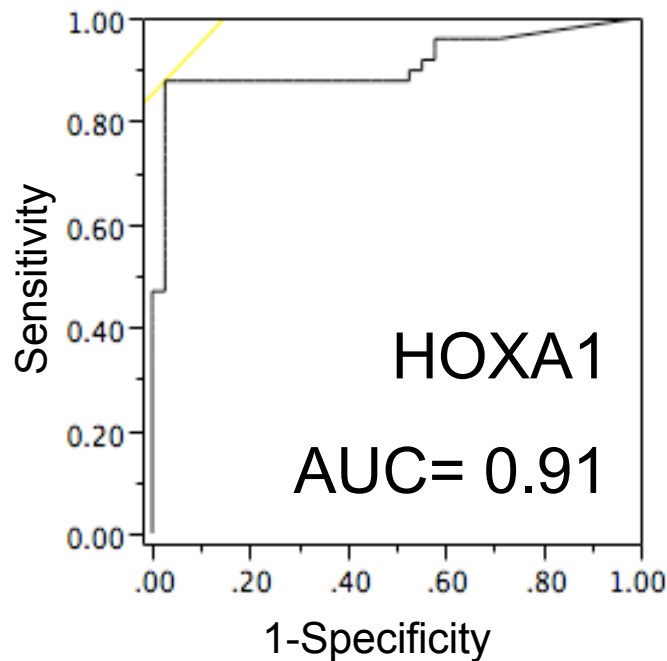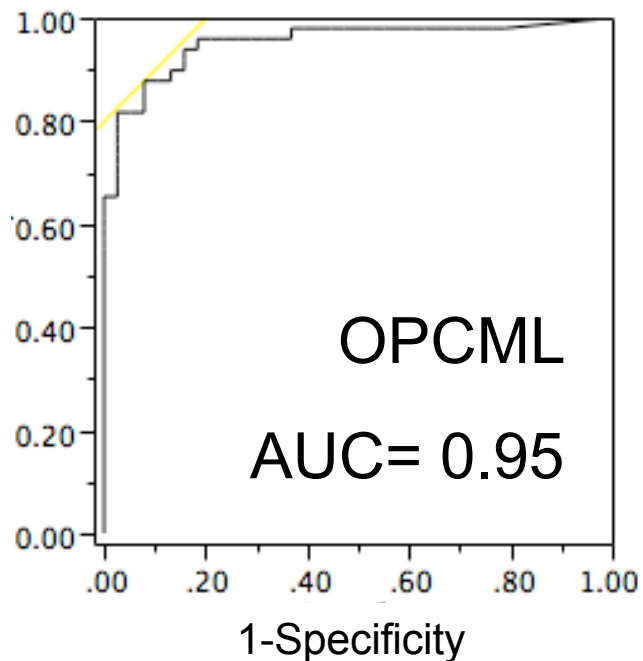

Supplement: MOESM4 [file 9553840]
